# Supplementary material
Source: PubMed Central journal article supplement (PMC3770862)
Supplement: NIHMS481603-supplement-216_2013_7020_MOESM1_ESM.pdf [file NIHMS481603-supplement-216_2013_7020_MOESM1_ESM.pdf]

# Multi-channel PMMA microfluidic biosensor with integrated IDUAs for electrochemical detection

## Analytical and Bioanalytical Chemistry

### Electronic Supplementary Material

Nongnoot Wongkaew, Peng He, Vanessa Kurth, Werarak Surareungchai, Antje J. Baeumner\*

\* Corresponding author, Department of Biological and Environmental Engineering, Cornell University, 202 Riley Robb Hall, Ithaca, NY 14853, USA, e-mail: [ajb23@cornell.edu](mailto:ajb23@cornell.edu)

**Table S1** Effect of bubble generation during surface modification on IDUA

| Method | PMMA surface activation by coupling reagents                                                                                                                            | Cystamine conjugation                                                                                                                                             | IDUAs after etching                                                                                              |
|--------|-------------------------------------------------------------------------------------------------------------------------------------------------------------------------|-------------------------------------------------------------------------------------------------------------------------------------------------------------------|------------------------------------------------------------------------------------------------------------------|
| 1      | 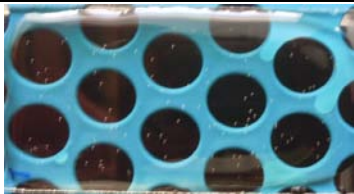<br>2 mL of 300 mM Sulfo-NHS + 300 mM EDC in 0.05 M MES buffer                        | <br>2 mL of 300 mM cystamine in 0.05 M Carbonate buffer                        | <br>100x<br>short circuited  |
| 2      | <br>1 mL of 300 mM Sulfo-NHS + 300 mM EDC + 0.1% (v/v) Tween 20 in 0.05 M MES buffer | <br>1 mL of 300 mM cystamine + 0.1% (v/v) Tween 20 in 0.05 M Carbonate buffer | <br>100x<br>intact circuit  |
| 3      | <br>2 mL of 300 mM NHS + 300 mM EDC in 0.05 M MES buffer                             | <br>2 mL of 300 mM cystamine in 0.05 M Carbonate buffer                       | <br>100x<br>short circuited |

**Table S1** Effect of bubble generation during surface modification on IDUA (continued)

| Method | PMMA surface activation<br>by coupling reagents                                                                                                                               | Cystamine conjugation                                                                                                                                                         | IDUAs after etching                                                                                    |
|--------|-------------------------------------------------------------------------------------------------------------------------------------------------------------------------------|-------------------------------------------------------------------------------------------------------------------------------------------------------------------------------|--------------------------------------------------------------------------------------------------------|
| 5      | 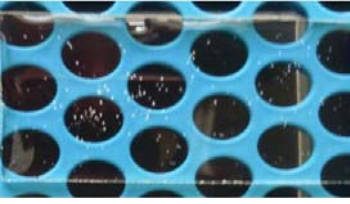<br><b>1 mL</b> of 300 mM NHS + 300 mM EDC + <b>0.1% (v/v) Tween 20</b> in 0.05 M MES buffer | <br><b>1 mL</b> of 300 mM cystamine + <b>0.1% (v/v) Tween 20</b> in 0.05 M Carbonate buffer | <br>short circuited |
| 6      | <br><b>30 mL</b> of 300 mM NHS + 300 mM EDC in 0.05 M MES buffer                             | <br><b>30 mL</b> of 300 mM cystamine in 0.05 M Carbonate buffer                             | <br>short circuited |



**Table S2** Optimization of bonding condition in which 4000 lbf bonding force, 8 min UV treatment time, 5 min bonding time with photoresist protection were used in the end. The first column provides conditions used. In the upper images for each condition a large view of the IDUAs with overlaid PMMA channels are shown. In the lower images a close-up of the IDUAs are shown. Defects are visible for all of the non-optimal conditions.

| Parameter                                                                                                                                                                                                | Result                                              |                                                        |
|----------------------------------------------------------------------------------------------------------------------------------------------------------------------------------------------------------|-----------------------------------------------------|--------------------------------------------------------|
| <p><b>Bonding pressure</b></p> <ul style="list-style-type: none"> <li>- UV treatment for 8 min</li> <li>- bonding time for 5 min</li> <li>- Without photoresist protection</li> </ul>                    | <p style="text-align: center;">4000 lbf</p>         | <p style="text-align: center;">5000 lbf</p>            |
| <p><b>Effect of photoresist protection</b></p> <ul style="list-style-type: none"> <li>- UV treatment for 8 min</li> <li>- bonding time for 5 min</li> <li>- Applied bonding pressure 4000 lbf</li> </ul> | <p style="text-align: center;">With photoresist</p> | <p style="text-align: center;">Without photoresist</p> |
| <p><b>UV treatment time</b></p> <ul style="list-style-type: none"> <li>- bonding time for 5 min</li> <li>- Applied bonding force 4000 lbf</li> <li>- Without photoresist protection</li> </ul>           | <p style="text-align: center;">4 min</p>            | <p style="text-align: center;">8 min</p>               |
